# Supplementary material for: Pollution Characteristics of Different Components of PM2.5 in Taiyuan during 2017–2020 Wintertime and Their Toxicity Effects on HepG2 Cells
Source: MDPI journal article supplement (doi:10.3390/atmos15010032), 2023-12-27
Supplement: s1 [file s1]

Archive with 1 entries (1 files):
- atmosphere-2756975-supplementary.pdf
