# Supplementary material for: Pollution Characteristics of Different Components of PM2.5 in Taiyuan during 2017–2020 Wintertime and Their Toxicity Effects on HepG2 Cells
Source: MDPI journal article supplement (doi:10.3390/atmos15010032), 2023-12-27
Supplement: s1 [file s1 › atmosphere-2756975-supplementary.pdf]

## Supplementary material

Pollution Characteristics of Different Components of PM<sub>2.5</sub> in Taiyuan during 2017-2020 Wintertime and Their Toxicity Effects on HepG2 Cells

**Table S1** Primers sequences

**Table S2** Source analysis of characteristic ratios of individual PAH concentrations

**Fig. S1.** Changes in PM<sub>2.5</sub> pollutant concentration from 2017 to 2020

**Fig. S2.** Toxic effects of different concentrations of PM<sub>2.5</sub> exposure on HepG2 cells from 2017 to 2020

(A) WSP (B) OP (n=4, compared with control group, \*p<0.05, \*\*p<0.01)

**Fig. S3.** Effects of different concentrations of PM<sub>2.5</sub> exposure on LDH release from HepG2 cells during 2017-2020 (A) WSP (B) OP (n=4, compared with the control group, \*p<0.05, \*\*p<0.01; Compared between years, #p<0.05, ##p<0.01)

**Fig. S4.** Effects of different concentrations of PM<sub>2.5</sub> on IL-6 levels in HepG2 cells from 2017 to 2020

(A) WSP (B) OP (n=4, compared with the control group, \*p<0.05, \*\*p<0.01; Compared between years, #p<0.05, ##p<0.01)

**Fig. S5.** Effects of different concentrations of PM<sub>2.5</sub> on TNF- $\alpha$  levels in HepG2 cells from 2017 to 2020

(A) WSP (B) OP (n=4, compared with the control group, \*p<0.05, \*\*p<0.01; Compared between years, #p<0.05, ##p<0.01)

**Fig. S6.** Effects of different concentrations of PM<sub>2.5</sub> on intracellular ROS levels of HepG2 from 2017 to

2020 (A) WSP (B) OP (n=4, compared with the control group, \*p<0.05, \*\*p<0.01; Compared between years, #p<0.05, ##p<0.01)

**Fig. S7.** Effects of different concentrations of PM<sub>2.5</sub> on SOD content in HepG2 cells from 2017 to 2020

(A) WSP (B) OP (n=4, compared with the control group, \*p<0.05, \*\*p<0.01; Compared between years, #p<0.05, ##p<0.01)

**Fig. S8.** Effects of different concentrations of PM<sub>2.5</sub> on MDA content in HepG2 cells from 2017 to

2020 (A) WSP (B) OP (n=4, compared with the control group, \*p<0.05, \*\*p<0.01; Compared between years, #p<0.05, ##p<0.01)

**Fig. S9.** Effects of different concentrations of PM<sub>2.5</sub> on TG content in HepG2 cells from 2017 to 2020

(A) WSP (B) OP (n=4, compared with the control group, \*p<0.05, \*\*p<0.01; Compared between years, #p<0.05, ##p<0.01)

**Fig. S10.** Effects of different concentrations of PM<sub>2.5</sub> on FFA content in HepG2 cells from 2017 to

2020 (A) WSP (B) OP (n=4, compared with the control group, \*p<0.05, \*\*p<0.01; Compared between years, #p<0.05, ##p<0.01)

**Fig. S11.** Effects of different concentrations of PM<sub>2.5</sub> and its extracts on lipid metabolism in HepG2

cells in 2018 (A) WP (B) OP (C) WSP (n=4, compared with control group, \*p<0.05, \*\*p<0.01)

**Fig. S12.** Effects of different concentrations of PM<sub>2.5</sub> and its extracts on lipid metabolism in HepG2

cells in 2019 (A) WP (B) OP (C) WSP (n=4, compared with control group, \*p<0.05, \*\*p<0.01)

**Fig. S13.** Effects of different concentrations of PM<sub>2.5</sub> and its extracts on lipid metabolism in HepG2

cells in 2020 (A) WP (B) OP (C) WSP (n=4, compared with control group, \*p<0.05, \*\*p<0.01)

**Table S1** Primers sequences

| Genes         | Accession No.  | Sequence       |                                |
|---------------|----------------|----------------|--------------------------------|
| Srebp-1c      | NM_001321096.3 | Forward primer | 5'-ACACAGCAACCAGAAACTCAAG-3'   |
| Products      | 153bp          | Reverse primer | 5'-AGTGTGTCCTCCACCTCAGTCT-3    |
| Scd1          | NM_005063.5    | Forward primer | 5'-CTGCTTACTTGGTGAGGGTGC-3'    |
| Products      | 110bp          | Reverse primer | 5'-TTCTTGCCCTTGCTTCTTCC-3'     |
| PPAR $\alpha$ | NM_005036.6    | Forward primer | 5'- ATGGTGGACACGGAAAGCC-3'     |
| Products      | 124bp          | Reverse primer | 5'-CGATGGATTGCGAAATCTCTTGG-3'  |
| Cpt1 $\alpha$ | NM_001876.4    | Forward primer | 5'-TCCAGTTGGCTTATCGTGGTG-3'    |
| Products      | 98bp           | Reverse primer | 5'-TCCAGAGTCCGATTGATTTTGC-3'   |
| Acox1         | NM_007292.6    | Forward primer | 5'-ACTCGCAGCCAGCGTTATG-3'      |
| Products      | 84bp           | Reverse primer | 5'-AGGGTCAGCGATGCCAAAC-3'      |
| FASN          | NM_004104.4    | Forward primer | 5'-CTCAGCCGCCATCTACAACATCG-3'  |
| Products      | 129bp          | Reverse primer | 5'- GCCAGCGTCTTCCACACTATGC-3'  |
| ACC1          | NM_198838.2    | Forward primer | 5'- GGTAATGCGGTATGGAAGTCG-3    |
| Products      | 195bp          | Reverse primer | 5'- GCCTGAAACATGATCTGTGCTG-3'  |
| FATP2         | NM_003645.4    | Forward primer | 5'- TACTCTTGCCCTTGCGGACTAA-3'  |
| Products      | 100bp          | Reverse primer | 5'- CCGAAGCAGTTCACCGATATAC-3'  |
| FATP5         | NM_012254.3    | Forward primer | 5'- CATGGCGTGACAGTGATCCT-3'    |
| Products      | 121bp          | Reverse primer | 5'- CAGCCCGTAGTCCATTGCC-3'     |
| CD36          | NM_001127443.2 | Forward primer | 5'-CTTTGGCTTAATGAGACTGGGAC -3' |
| Products      | 134bp          | Reverse primer | 5'- GCAACAAACATCACCACACCA -3'  |

|          |                |                |                              |
|----------|----------------|----------------|------------------------------|
| APOB     | NM_000384.3    | Forward primer | 5'-AGACAGCATCTTCGTGTTTCAA-3' |
| Products | 123bp          | Reverse primer | 5'-ATCATTTAGTTTCAGCCCAGGA-3' |
| FABP1    | NM_001443.3    | Forward primer | 5'-GTGGGATGGGAAGGAAAG-3'     |
| Products | 92bp           | Reverse primer | 5'-TCCGAGTACAGGTGACATTG-3    |
| MTTP     | NM_001300785.2 | Forward primer | 5'-AGCTCACGTACTCCACTGAAG-3'  |
| Products | 107bp          | Reverse primer | 5'-CCTCCATAGTAAGGCCACATCC-3' |
| GAPDH    | NM_002046.7    | Forward primer | 5'-GGAAGGACTCATGACCACAGT-3'  |
| Products | 85bp           | Reverse primer | 5'-GCCATCATGCCACAGTTTC-3'    |

---

**Table S2** Source analysis of characteristic ratios of individual PAH concentrations

| PAH characteristic ratios | Scope    | Source                   |
|---------------------------|----------|--------------------------|
| FLA/(FLA + PYR)           | <0.4     | Oil burning              |
|                           | 0.4-0.5  | Fossil fuel burning      |
|                           | >0.5     | Coal and biomass burning |
| ANT/(ANT + PHE)           | <0.1     | Oil burning              |
|                           | >0.1     | Coal burning             |
|                           | 0.2-0.35 | Coal burning             |
| BaA/(BaA + CHR)           | >0.35    | Motor vehicle emissions  |
|                           | <0.2     | Oil burning              |
| IcdP/(IcdP + BghiP)       | 0.2-0.5  | Oil burning              |
|                           | >0.5     | Coal and biomass burning |

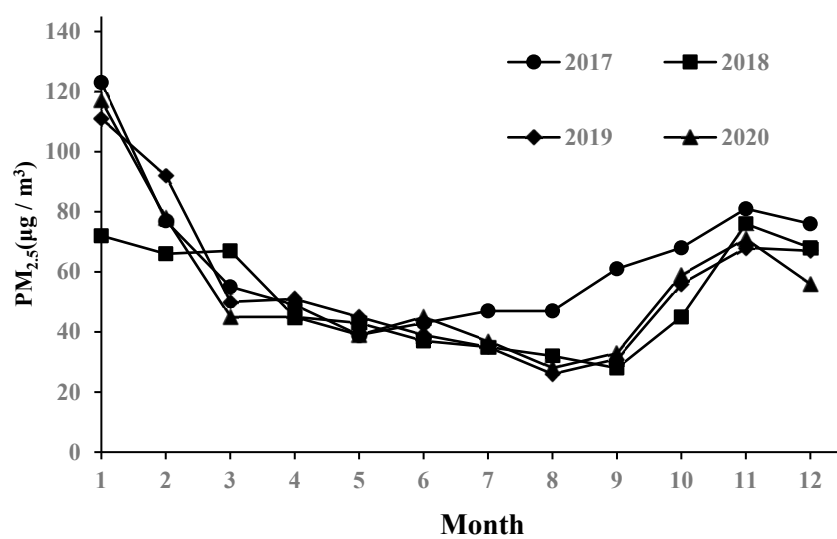

**Fig. S1** Changes in PM<sub>2.5</sub> pollutant concentration from 2017 to 2020

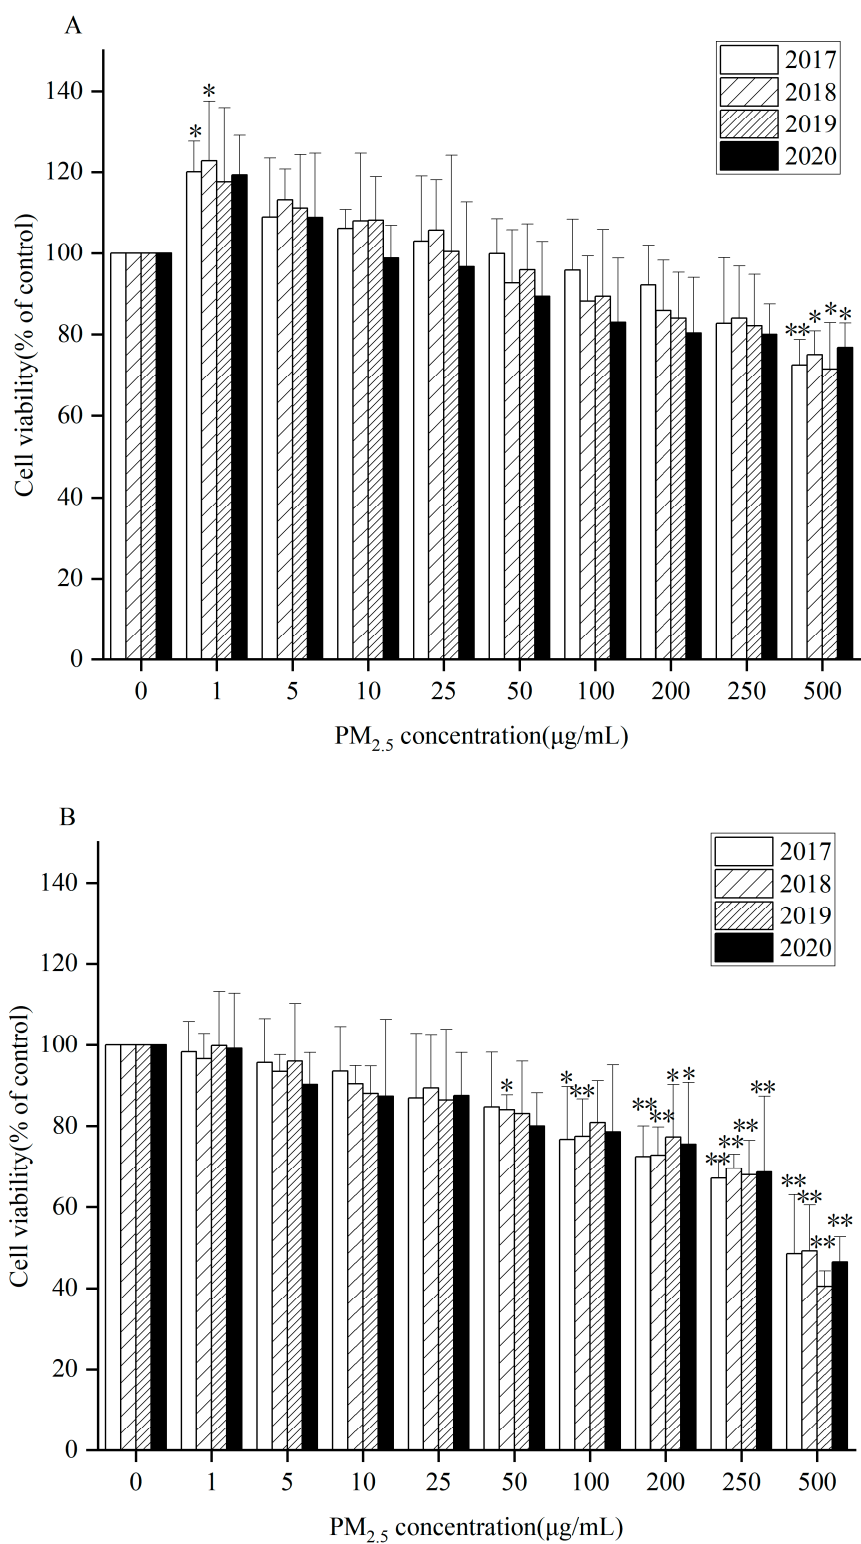

**Fig. S2** Toxic effects of different concentrations of PM<sub>2.5</sub> exposure on HepG2 cells from 2017 to 2020

(A) WSP (B) OP

(n=4, compared with control group, \*p<0.05, \*\*p<0.01)

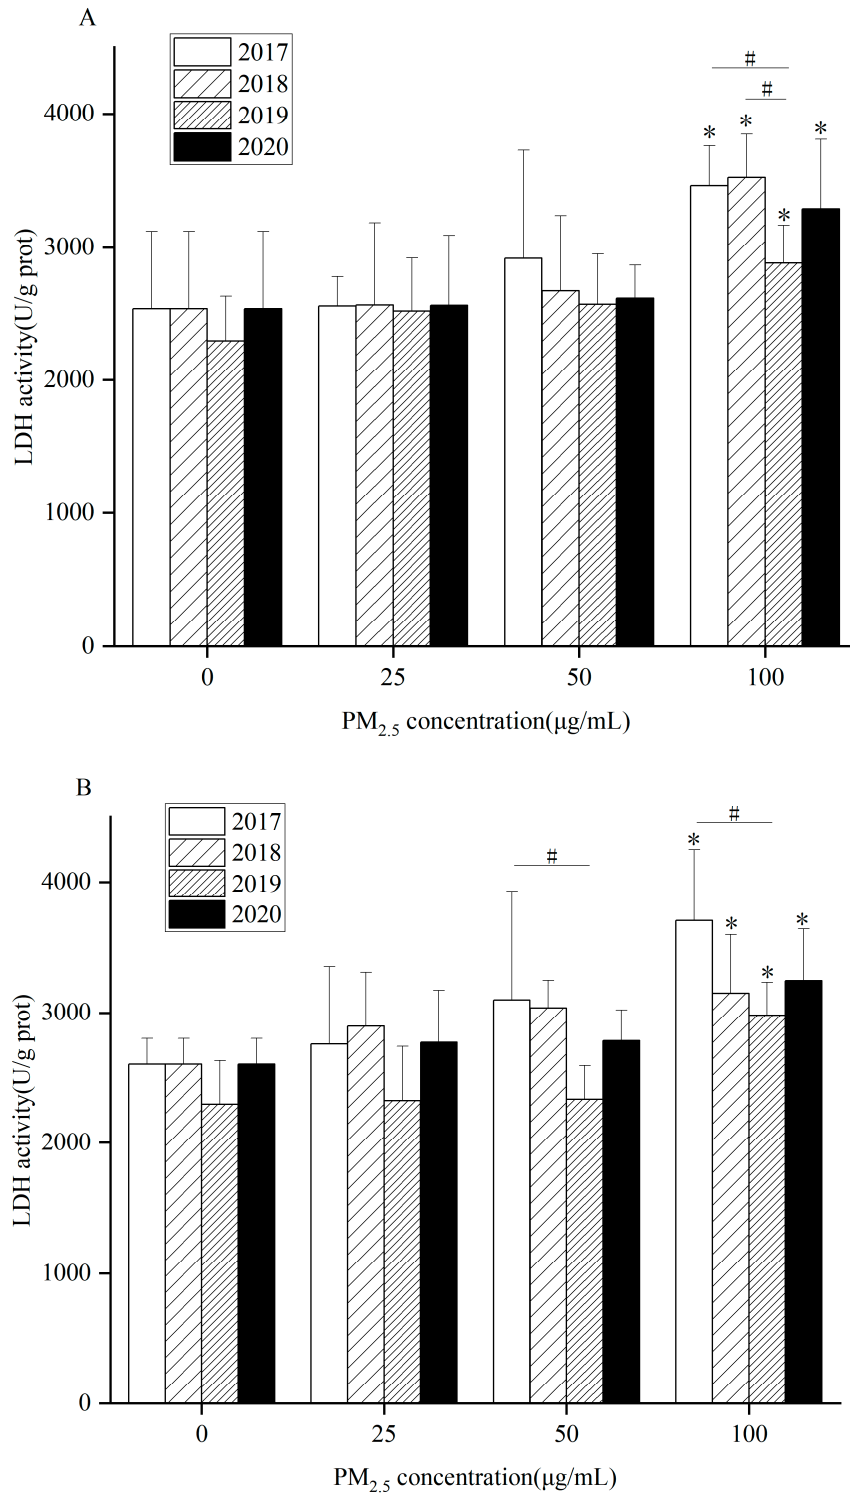

**Fig. S3** Effects of different concentrations of PM<sub>2.5</sub> exposure on LDH release from HepG2 cells during

2017-2020 (A) WSP (B) OP

(n=4, compared with the control group, \*p<0.05, \*\*p<0.01; Compared between years, #p<0.05)

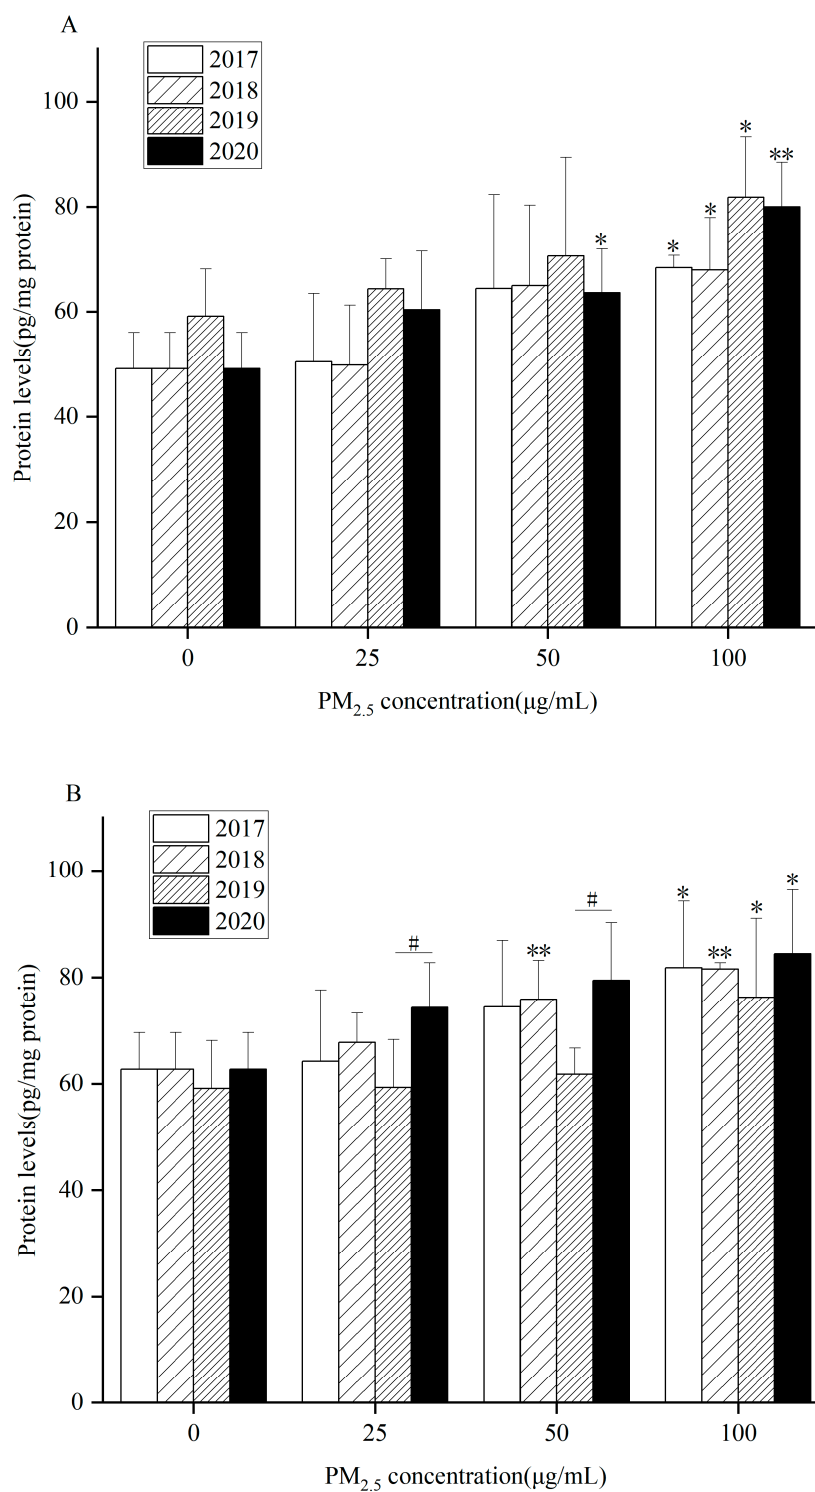

**Fig. S4** Effects of different concentrations of PM<sub>2.5</sub> on IL-6 levels in HepG2 cells from 2017 to 2020

(A) WSP (B) OP

(n=4, compared with the control group, \*p<0.05, \*\*p<0.01; Compared between years, #p<0.05)

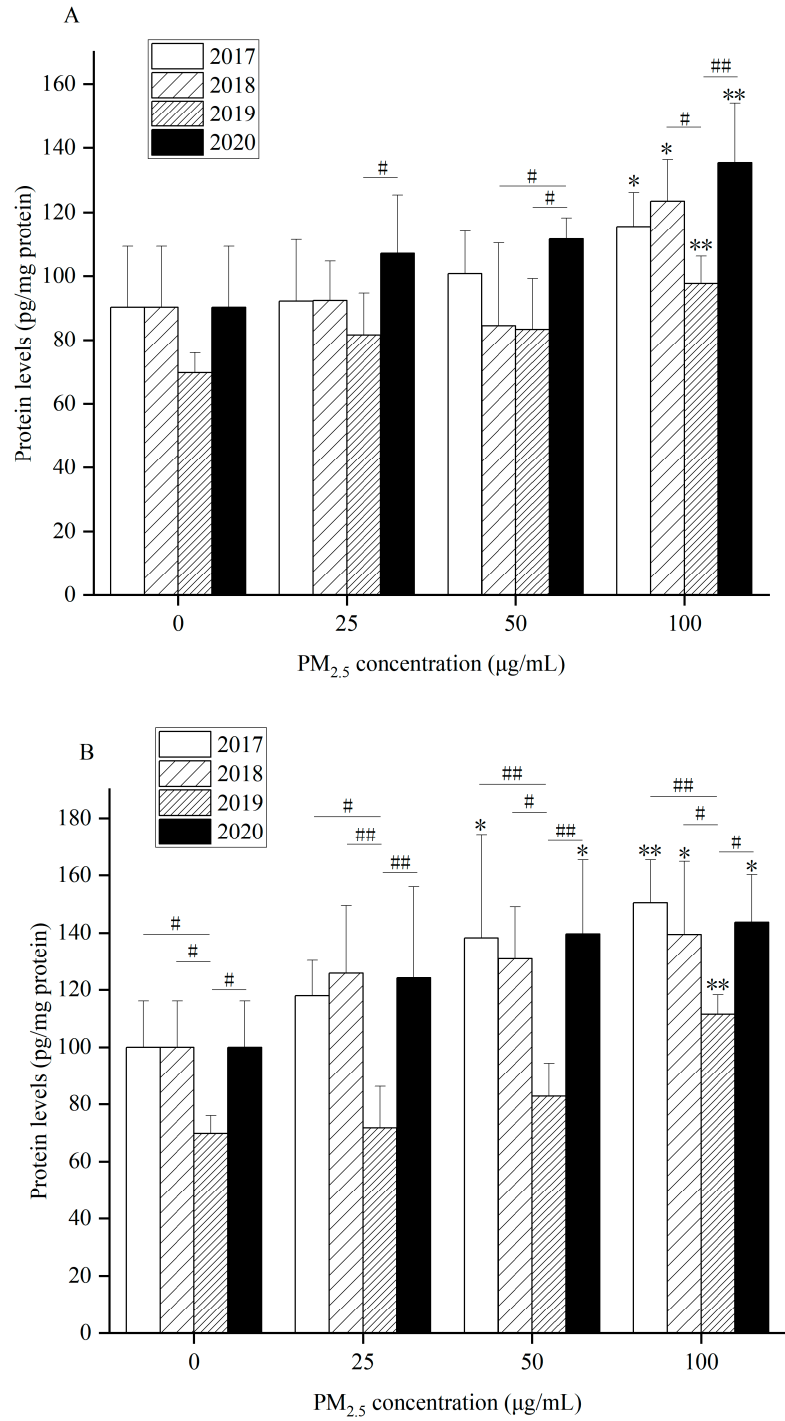

**Fig. S5** Effects of different concentrations of PM<sub>2.5</sub> on TNF- $\alpha$  levels in HepG2 cells from 2017 to 2020

(A) WSP (B) OP (n=4, compared with the control group, \*p<0.05, \*\*p<0.01; Compared between years,

#p<0.05, ##p<0.01)

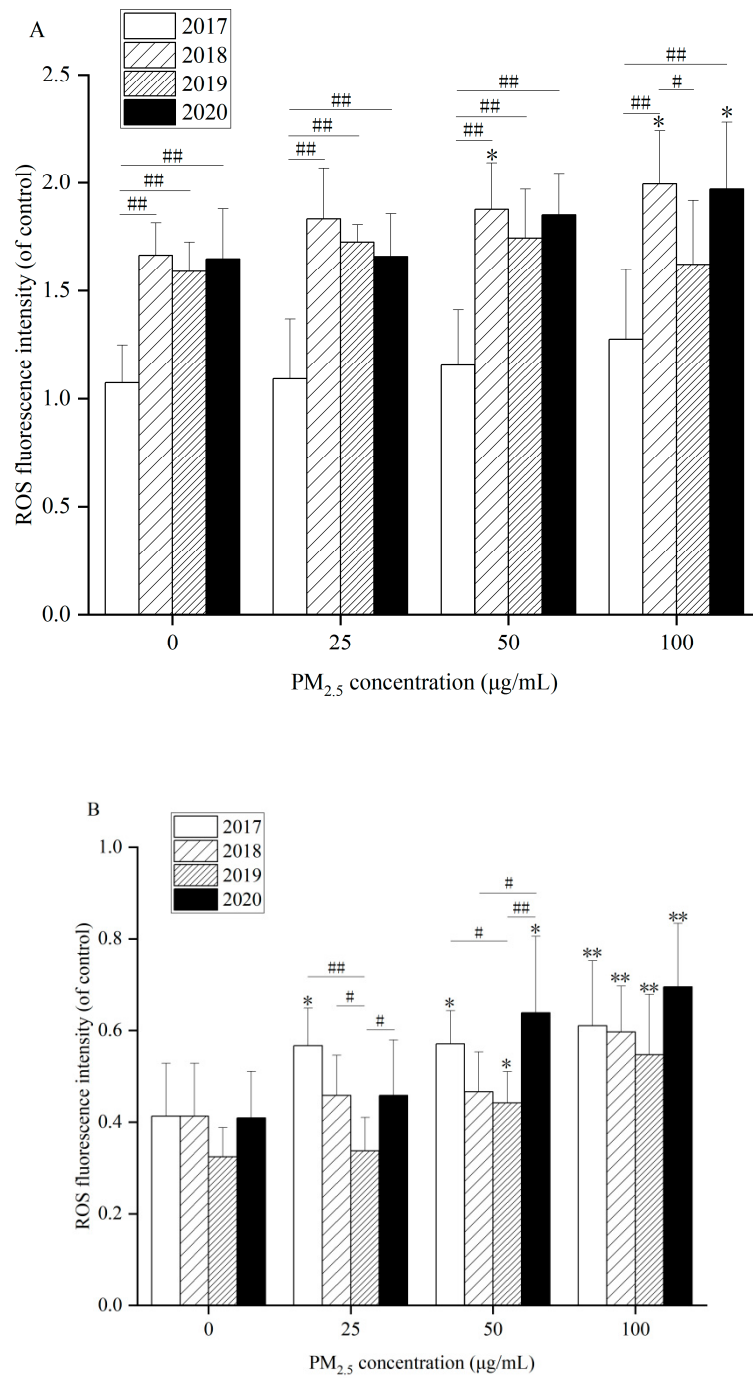

**Fig. S6** Effects of different concentrations of PM<sub>2.5</sub> on intracellular ROS levels of HepG2 from 2017 to

2020 (A) WSP (B) OP

(n=4, compared with the control group, \*p<0.05, \*\*p<0.01; Compared between years, #p<0.05,

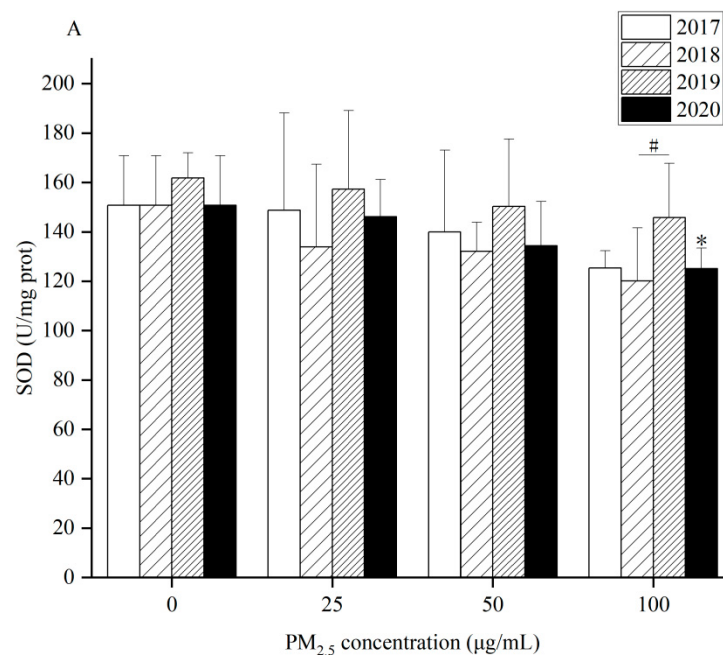

##p<0.01)

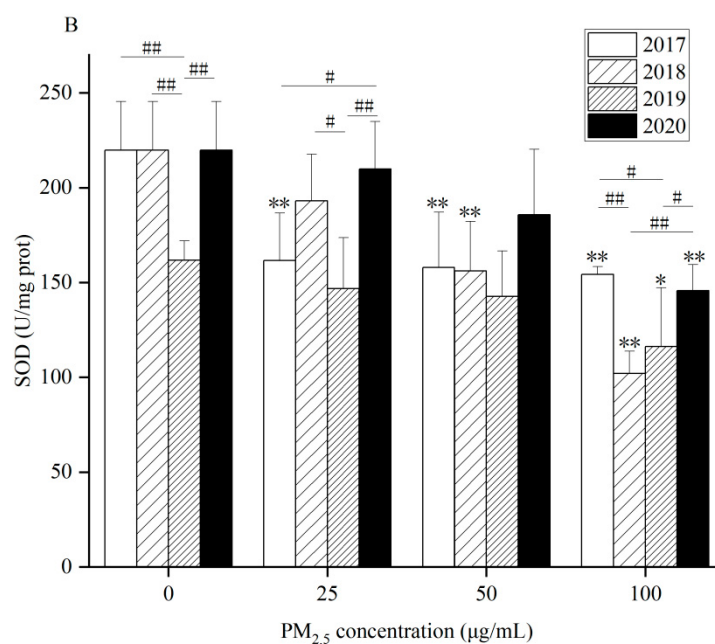

**Fig. S7** Effects of different concentrations of PM<sub>2.5</sub> on SOD content in HepG2 cells from 2017 to 2020

(A) WSP (B) OP (n=4, compared with the control group, \*p<0.05, \*\*p<0.01; Compared between years,

#p<0.05, ##p<0.01)

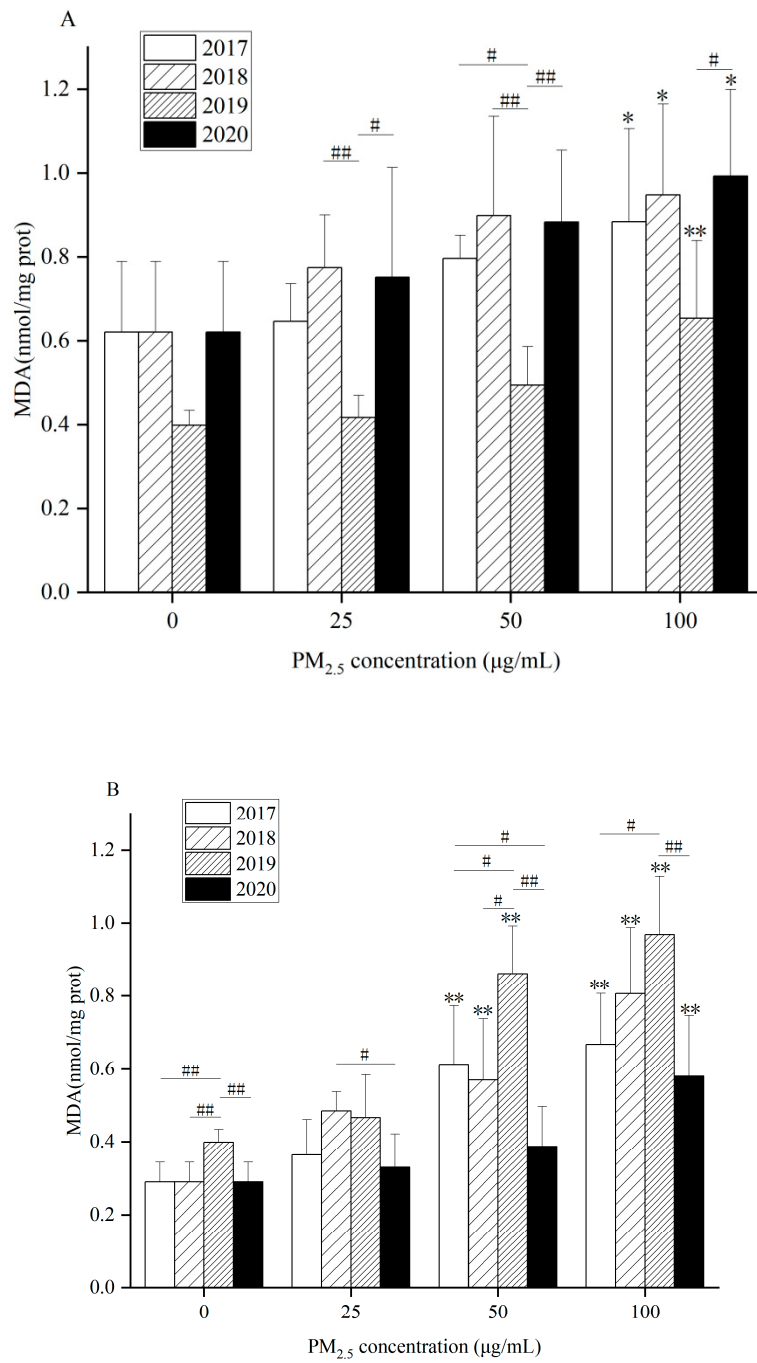

**Fig. S8** Effects of different concentrations of PM<sub>2.5</sub> on MDA content in HepG2 cells from 2017 to

2020 (A) WSP (B) OP

(n=4, compared with the control group, \*p<0.05, \*\*p<0.01; Compared between years, #p<0.05,

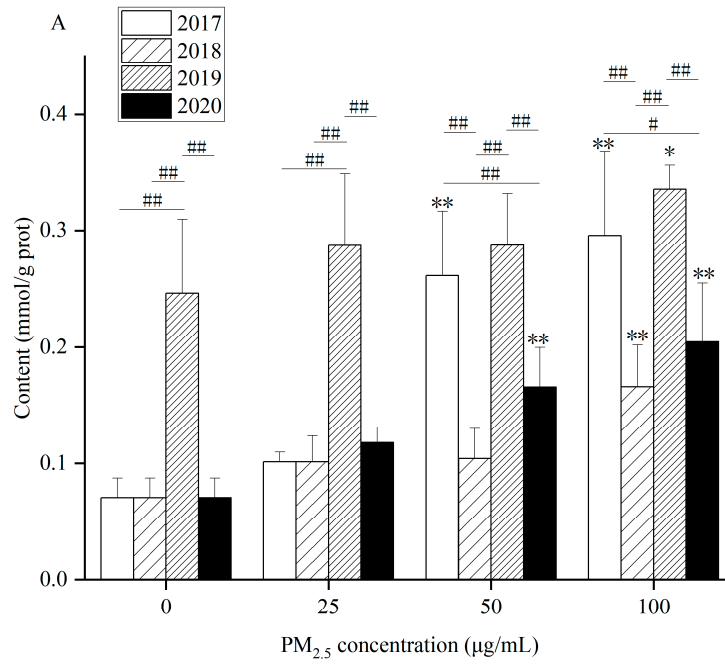

###p<0.01)

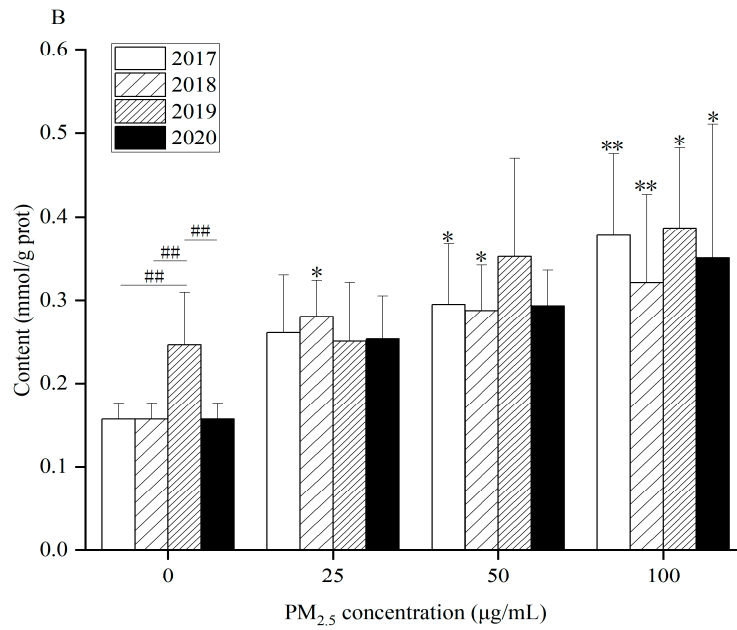

**Fig. S9** Effects of different concentrations of PM<sub>2.5</sub> on TG content in HepG2 cells from 2017 to

2020 (A) WSP (B) OP(n=4, compared with the control group, \*p<0.05, \*\*p<0.01; Compared between years, #p<0.05, ##p<0.01)

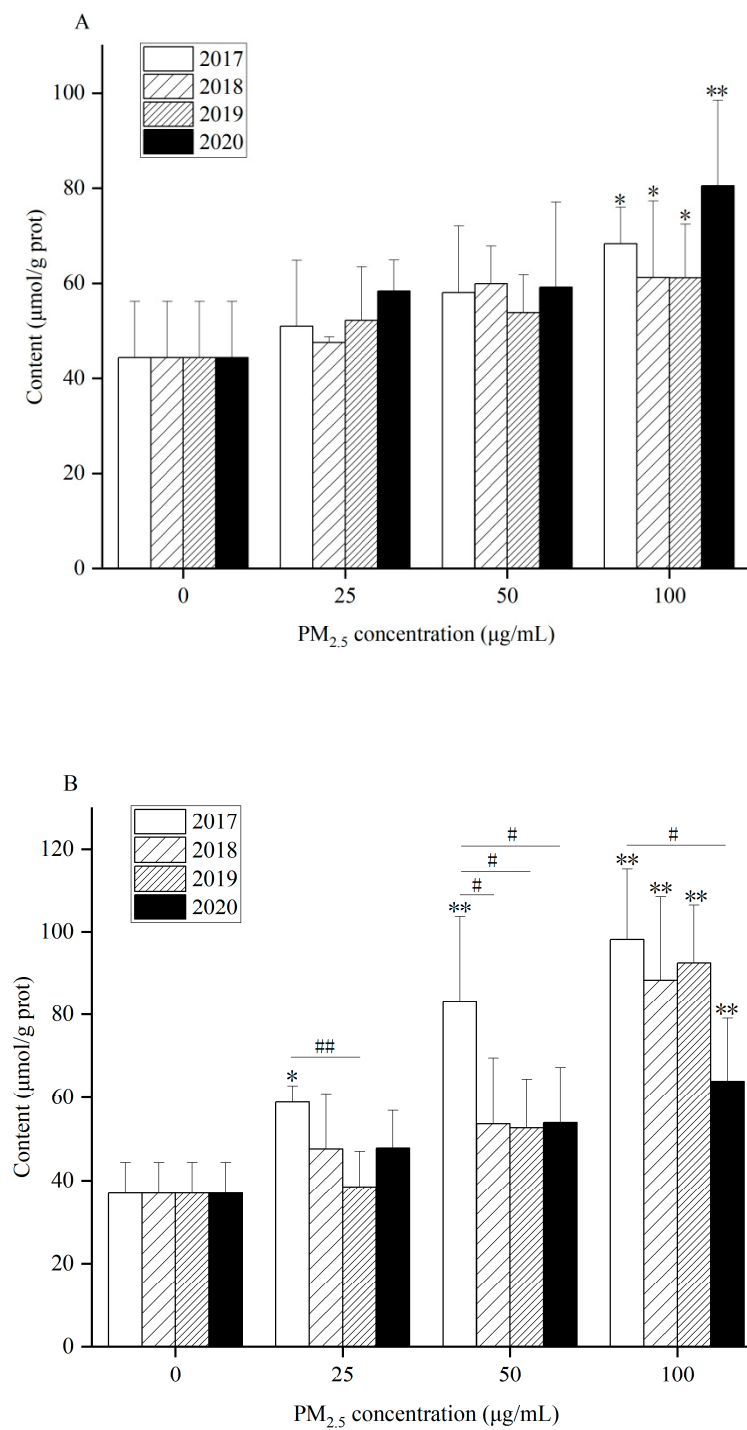

**Fig. S10** Effects of different concentrations of PM<sub>2.5</sub> on FFA content in HepG2 cells from 2017 to 2020

(A) WSP (B) OP

(n=4, compared with the control group, \*p<0.05, \*\*p<0.01; Compared between years, #p<0.05,

##p<0.01)

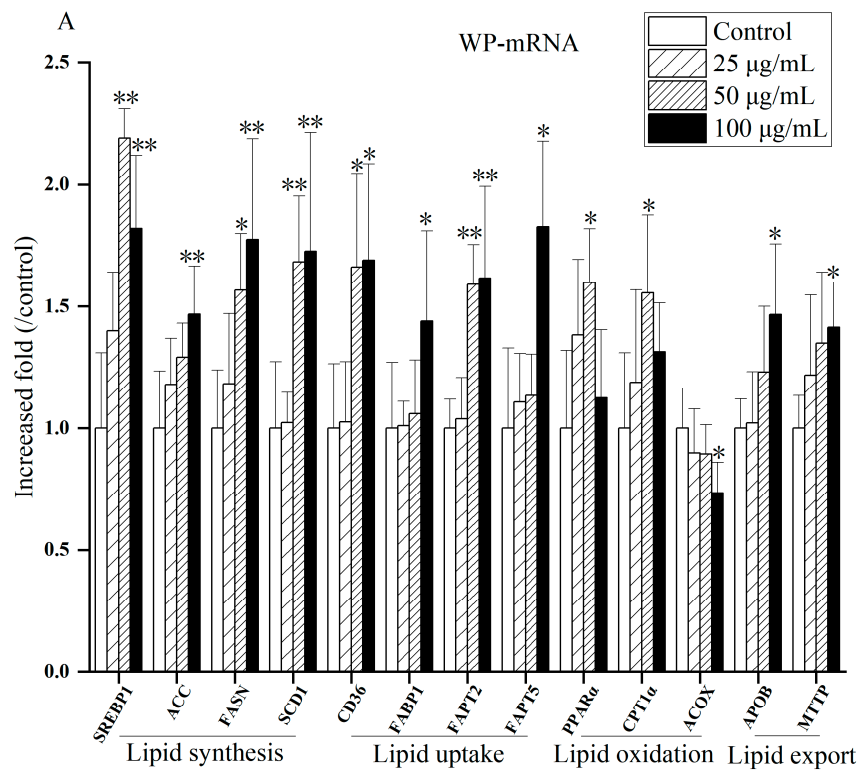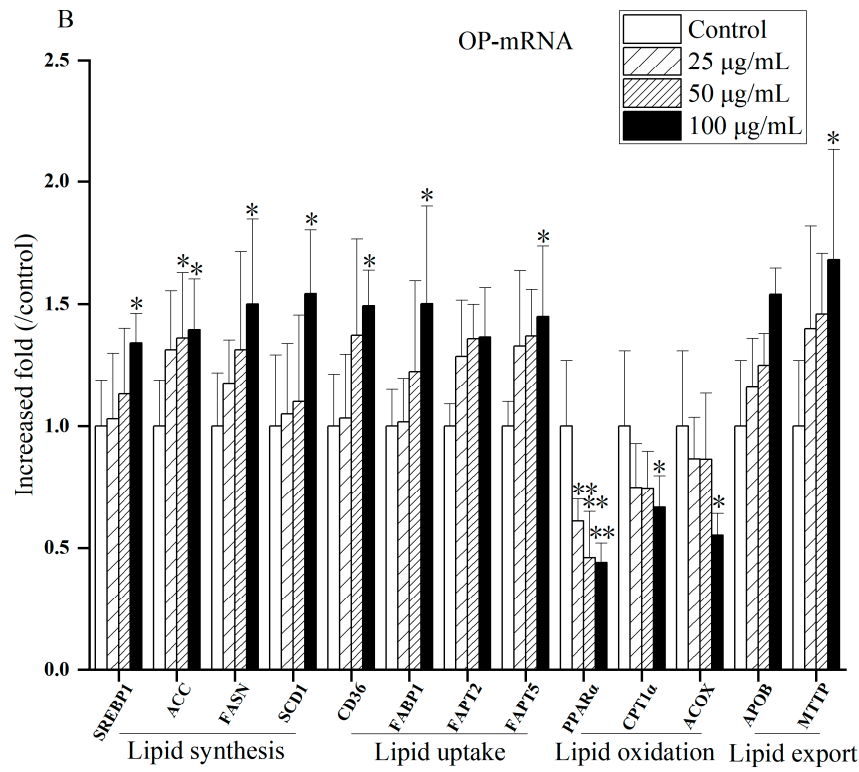

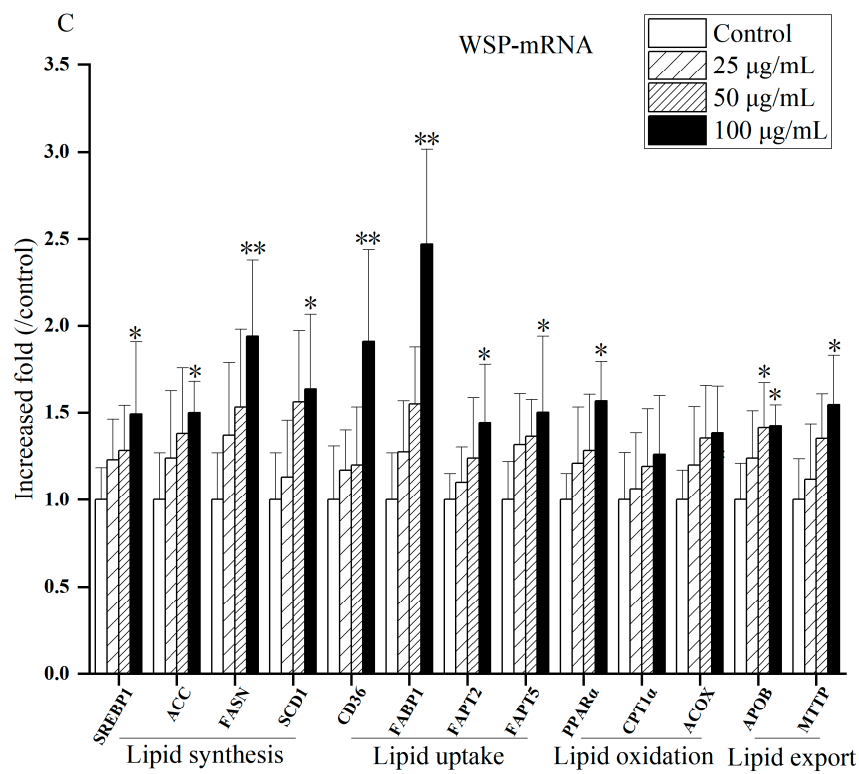

**Fig. S11** Effects of different concentrations of PM<sub>2.5</sub> and its extracts on lipid metabolism in HepG2

cells in 2018 (A) WP (B) OP (C) WSP

(n=4, compared with control group, \*p<0.05, \*\*p<0.01)

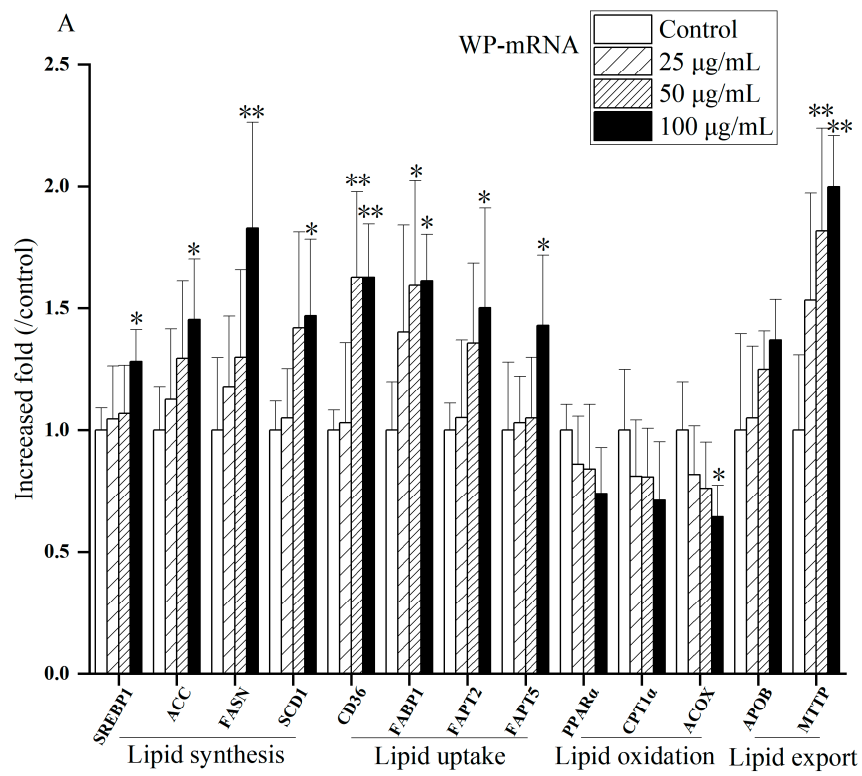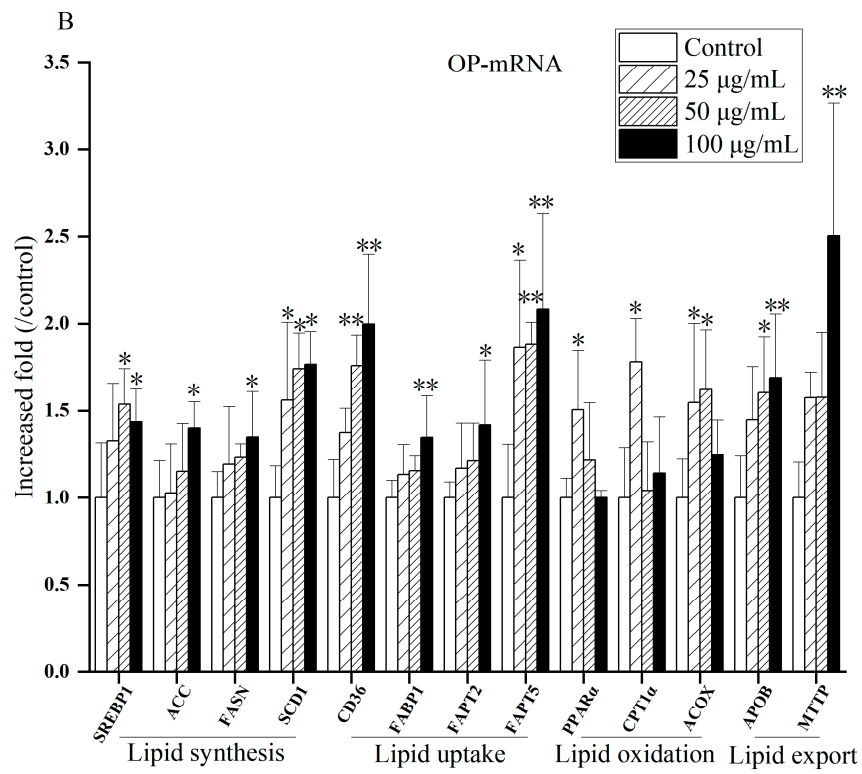

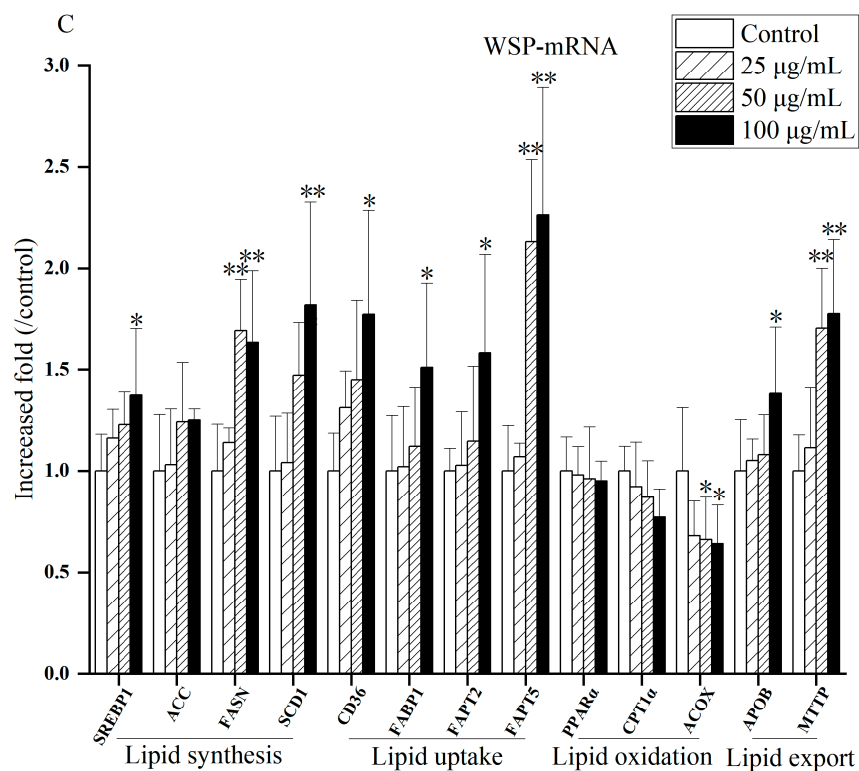

**Fig. S12** Effects of different concentrations of PM<sub>2.5</sub> and its extracts on lipid metabolism in HepG2

cells in 2019 (A) WP (B) OP (C) WSP

(n=4, compared with control group, \*p<0.05, \*\*p<0.01)

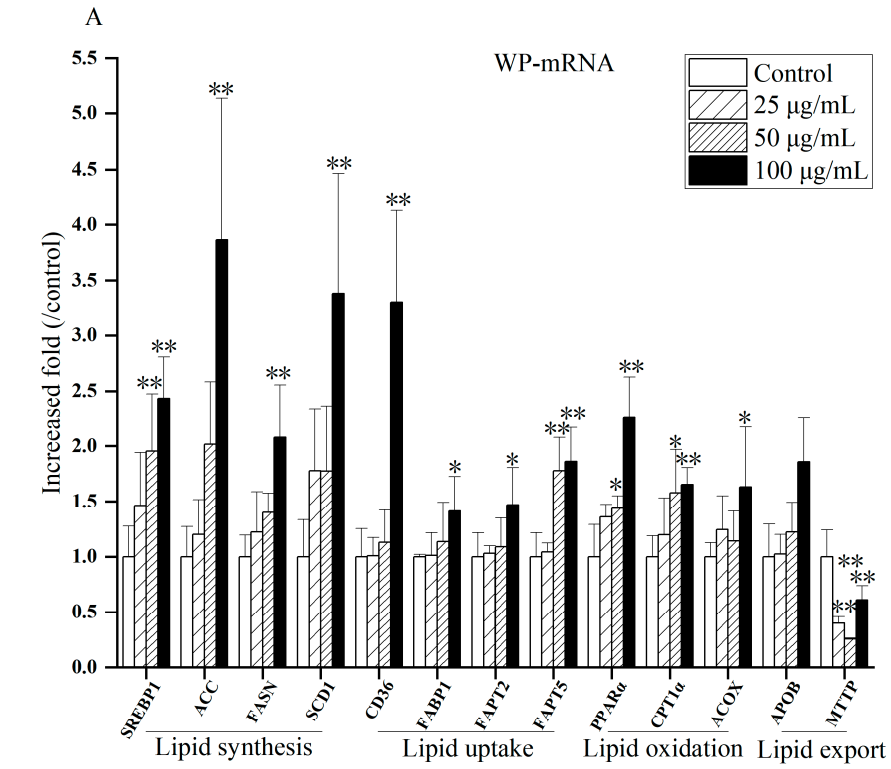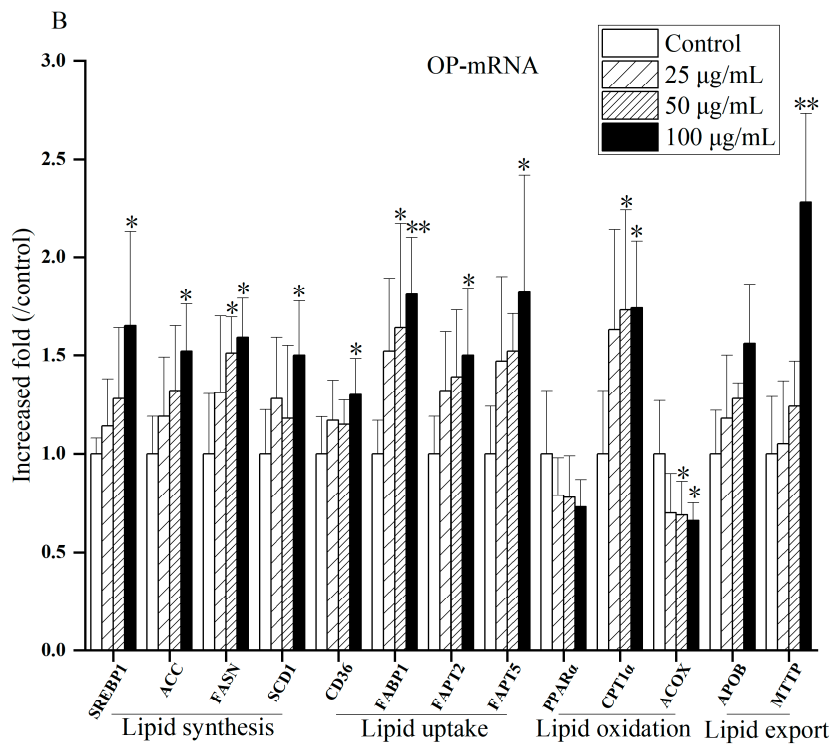

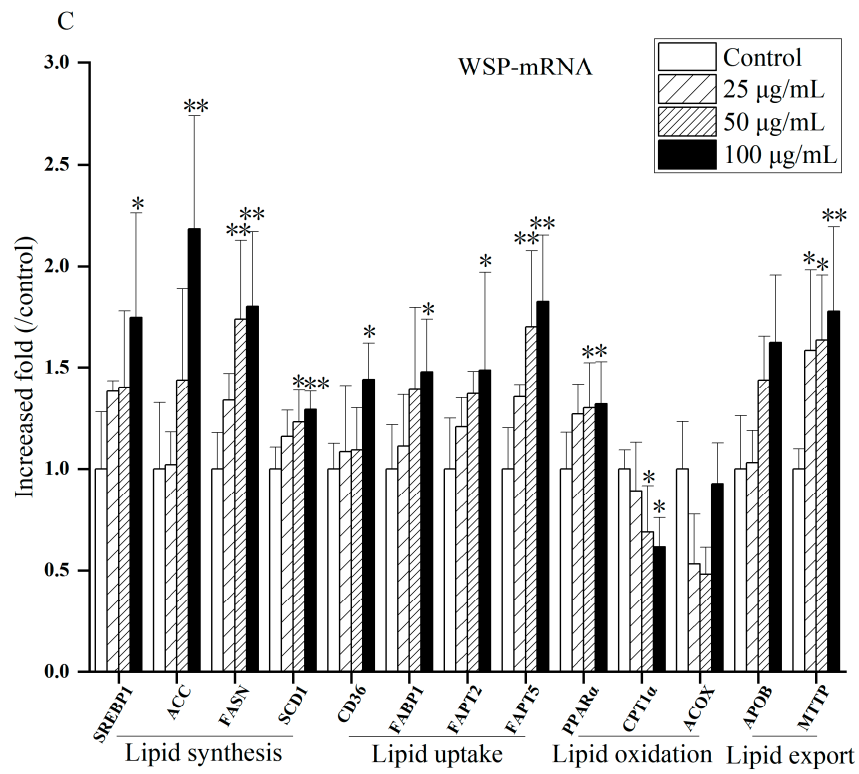

**Fig. S13** Effects of different concentrations of PM<sub>2.5</sub> and its extracts on lipid metabolism in HepG2

cells in 2020 (A) WP (B) OP (C) WSP

(n=4, compared with control group, \*p<0.05, \*\*p<0.01)
